# Supplementary material for: A biphasic growth model for cell pole elongation in mycobacteria
Source: PubMed Central journal article supplement (PMC6978421; doi:10.1038/s41467-019-14088-z), 2020-01-23
Supplement: 41467_2019_14088_MOESM2_ESM.pdf [file 41467_2019_14088_MOESM2_ESM.pdf]

## Description of Additional Supplementary Files

File Name: Supplementary Movie 1

Description: **Time-lapse atomic force microscopy (AFM) of *M. smegmatis* growth and division.** Time-lapse AFM height (3D) movie with the error channel overlaid as a skin reveals pole elongation and the spatial localization of nanostructures apparent at the cell surface.

File Name: Supplementary Movie 2

Description: **Correlated phase-contrast and fluorescence time-lapse microscopy of *M. smegmatis* expressing Wag31-GFP.** Scale bar, 5  $\mu\text{m}$ .

File Name: Supplementary Movie 3

Description: **Correlated phase-contrast and fluorescence time-lapse microscopy of *M. smegmatis* expressing Wag31-Dendra2 before (green) and after (red) UV-induced photo-conversion.** Scale bar, 10  $\mu\text{m}$ .
